# Supplementary material for: Nanoridge patterns on polymeric film by a photodegradation copying method for metallic nanowire networks
Source: Royal Society of Chemistry journal article supplement (doi:10.1039/c8ra02249f), 2018-01-01
Supplement: c8ra02249f1.pdf [file c8ra02249f1.pdf]

## Supplementary Information

# Nanoridge patterns on polymeric film by photodegradation copying method for metallic nanowire networks

Jun Wang,<sup>a,b,†</sup> Shuye Zhang,<sup>a,†</sup> Zhiyuan Shi,<sup>a,†</sup> Jinting Jiu,<sup>b</sup> Chunhui Wu,<sup>c</sup> Tohru Sugahara,<sup>b</sup> Shijo Nagao,<sup>b</sup> Katsuaki Suganuma,<sup>b</sup> Peng He,<sup>a,\*</sup>

a. State Key Laboratory of Advanced Welding and Joining, Harbin Institute of Technology, Harbin 150001, China

b. The Institute of Scientific and Industrial Research, Osaka University, Ibaraki, Osaka 567-0047, Japan

c. Department of Materials Science and Engineering, South University of Science and Technology of China, Shenzhen 518055, China

† Dr. Jun wang, Dr. Shuye Zhang and Zhiyuan Shi contributed equally to this paper.

Corresponding author: [hithepeng@hit.edu.cn](mailto:hithepeng@hit.edu.cn)

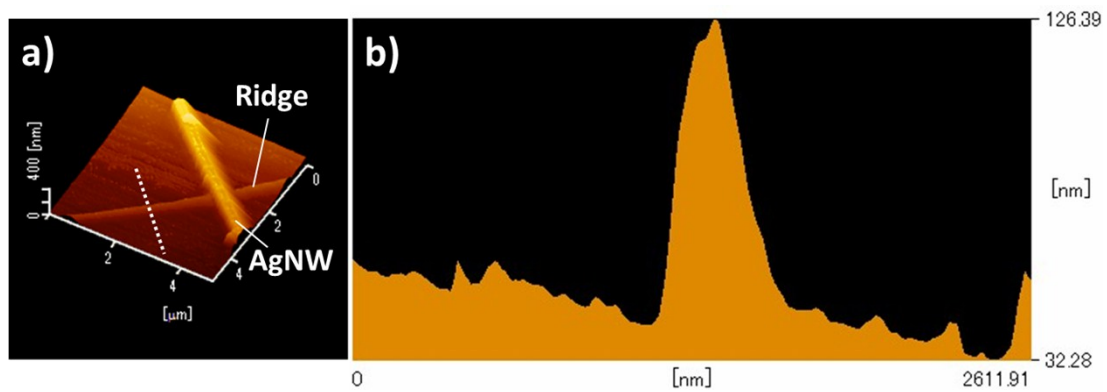

**Figure S1.** The AFM image of the AgNW and ridge on PET film. (a) the bare PET area, the AgNW and the ridge once shielded by AgNW; (b) the roughness along the dash line in (a).
